# Supplementary material
Source: Springer Nature journal article supplement (https://www.springermedizin.de/resource/supplementary/12885_2012_4002_MOESM1_ESM.pdf/9465000)

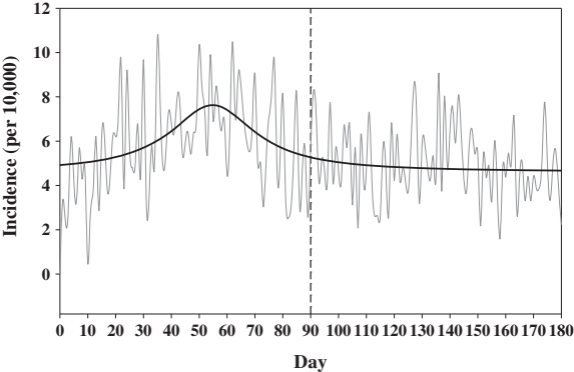

Supplement: MOESM1 [file 9465000]
